# Supplementary material
Source: PubMed Central journal article supplement (PMC5885889)
Supplement: jamacardiol-3-242-s001.pdf [file jamacardiol-3-242-s001.pdf]

## Supplementary Online Content

Elmariah S, Farrell LA, Furman D, et al. Association of acylcarnitines with left ventricular remodeling in patients with severe aortic stenosis undergoing transcatheter aortic valve replacement. *JAMA Cardio*. Published online January 3, 2018.  
doi:10.1001/jamacardio.2017.4873

**eTable 1.** Baseline patient characteristics.

**eTable 2.** Heat map depicting Pearson correlation coefficients with measures of left ventricular remodeling

This supplementary material has been provided by the authors to give readers additional information about their work.

| <b>Supplemental Table 1.</b> Baseline patient characteristics.                                                                                                                                                                                                                                                                                    |                        |
|---------------------------------------------------------------------------------------------------------------------------------------------------------------------------------------------------------------------------------------------------------------------------------------------------------------------------------------------------|------------------------|
| <b>Clinical Characteristics</b>                                                                                                                                                                                                                                                                                                                   | <b>Patients (N=44)</b> |
| Age, y                                                                                                                                                                                                                                                                                                                                            | 81.9±8.5               |
| Female                                                                                                                                                                                                                                                                                                                                            | 23 (52)                |
| Weight, kg                                                                                                                                                                                                                                                                                                                                        | 82.3±27.9              |
| Height, cm                                                                                                                                                                                                                                                                                                                                        | 158.8±25.7             |
| BSA, m <sup>2</sup>                                                                                                                                                                                                                                                                                                                               | 1.8±0.3                |
| Diabetes mellitus                                                                                                                                                                                                                                                                                                                                 | 16 (36)                |
| IDDM                                                                                                                                                                                                                                                                                                                                              | 2 (5)                  |
| NIDDM                                                                                                                                                                                                                                                                                                                                             | 14 (33)                |
| Hypertension                                                                                                                                                                                                                                                                                                                                      | 36 (84)                |
| Hyperlipidemia                                                                                                                                                                                                                                                                                                                                    | 25 (58)                |
| Smoking                                                                                                                                                                                                                                                                                                                                           | 22 (51)                |
| Prior MI                                                                                                                                                                                                                                                                                                                                          | 4 (9)                  |
| Prior PCI                                                                                                                                                                                                                                                                                                                                         | 17 (40)                |
| Prior CABG                                                                                                                                                                                                                                                                                                                                        | 10 (23)                |
| Prior chronic kidney disease                                                                                                                                                                                                                                                                                                                      | 22 (50)                |
| Baseline creatinine                                                                                                                                                                                                                                                                                                                               | 1.14±0.37              |
| eGFR, mL/min/1.73 m <sup>2</sup>                                                                                                                                                                                                                                                                                                                  | 58.1±18.2              |
| <b>Echocardiographic Parameters</b>                                                                                                                                                                                                                                                                                                               |                        |
| LVEF, %                                                                                                                                                                                                                                                                                                                                           | 56.7±17.1              |
| LVMI, g/m <sup>2</sup>                                                                                                                                                                                                                                                                                                                            | 117.3±41.4             |
| RWT                                                                                                                                                                                                                                                                                                                                               | 0.53±0.14              |
| Peak AVG, mm Hg                                                                                                                                                                                                                                                                                                                                   | 84.8±29.1              |
| Mean AVG, mm Hg                                                                                                                                                                                                                                                                                                                                   | 50.5±18.6              |
| AVA, cm <sup>2</sup>                                                                                                                                                                                                                                                                                                                              | 0.65±0.16              |
| AVG, aortic valve gradient; AVA, aortic valve area; BSA, body surface area; CABG, coronary artery bypass graft surgery; eGFR, estimated glomerular filtration rate; LVEF, left ventricular ejection fraction; LVMI, left ventricular mass index; MI, myocardial infarction; PCI, percutaneous coronary intervention; RWT, relative wall thickness |                        |

**Supplemental Table 2.** Heat map depicting Pearson correlation coefficients with measures of left ventricular remodeling.

|                             | LVMl    | LVEF     | RWT      |
|-----------------------------|---------|----------|----------|
| C18:1 oleoylcarnitine       | 0.59981 | -0.31375 | 0.18957  |
| C18 stearoylcarnitine       | 0.50502 | -0.12632 | 0.2925   |
| C16 palmitoylcarnitine      | 0.44128 | -0.13696 | 0.26548  |
| C18:2 linoleylcarnitine     | 0.40693 | -0.402   | 0.07727  |
| C26 hexacosanylcarnitine    | 0.37528 | 0.09572  | 0.38918  |
| xanthine                    | 0.33539 | -0.25964 | 0.06703  |
| choline                     | 0.33289 | -0.42621 | -0.10768 |
| C6 hexanoylcarnitine        | 0.32093 | -0.10686 | 0.29697  |
| hydroxyanthranilic acid     | 0.30499 | -0.06693 | 0.28972  |
| lysine                      | 0.28782 | -0.07789 | 0.10649  |
| glutamine                   | 0.27102 | -0.06949 | 0.10286  |
| betaine                     | 0.26591 | -0.22331 | 0.0588   |
| cobalamin                   | 0.24953 | -0.16202 | 0.01198  |
| C9 nonanoylcarnitine        | 0.24714 | 0.02356  | 0.16648  |
| C14 myristoylcarnitine      | 0.24082 | 0.06115  | 0.29528  |
| C2 acetylcarnitine          | 0.22957 | -0.07206 | 0.21911  |
| citrulline                  | 0.21577 | -0.14228 | 0.07782  |
| methionine                  | 0.21374 | -0.09164 | 0.10923  |
| cytidine                    | 0.21133 | -0.25007 | -0.26798 |
| cysteamine                  | 0.2113  | 0.08783  | 0.25372  |
| C12 lauroylcarnitine        | 0.206   | 0.06918  | 0.37563  |
| thiamine                    | 0.20274 | -0.03232 | 0.15376  |
| kynurenine                  | 0.20005 | -0.46668 | -0.32499 |
| C7 heptanoylcarnitine       | 0.19622 | 0.06818  | 0.22376  |
| C10 decanoylcarnitine       | 0.1958  | -0.03135 | 0.1687   |
| ornithine                   | 0.18776 | 0.07028  | 0.22066  |
| aminoisobutyric acid        | 0.18424 | -0.37995 | -0.13397 |
| C5 isovalerylcarnitine      | 0.18314 | 0.0847   | 0.37866  |
| C8 octanoylcarnitine        | 0.17662 | -0.10669 | 0.09375  |
| trimethylamine-N-oxide      | 0.17396 | -0.05045 | 0.29162  |
| niacinamide                 | 0.16983 | -0.08339 | 0.19936  |
| glycerol                    | 0.16872 | -0.04235 | 0.12364  |
| phosphoethanolamine         | 0.16746 | -0.0616  | 0.18735  |
| histidine                   | 0.15627 | 0.09622  | 0.21854  |
| spermidine                  | 0.14911 | -0.11045 | 0.12964  |
| kynurenic acid              | 0.14784 | -0.17257 | -0.09917 |
| thyroxine                   | 0.14529 | 0.05197  | 0.20838  |
| uridine                     | 0.14222 | -0.13258 | 0.2434   |
| tyrosine                    | 0.13651 | -0.18882 | -0.03577 |
| alpha_glycerophosphocholine | 0.13643 | 0.0031   | 0.128    |
| asparagine                  | 0.13267 | 0.01956  | 0.15652  |
| phenylalanine               | 0.13087 | -0.24593 | 0.01305  |
| adenosylhomocysteine        | 0.12958 | -0.22635 | -0.16705 |

|                            |          |          |          |
|----------------------------|----------|----------|----------|
| glucose                    | 0.12906  | -0.133   | -0.07854 |
| acetylcholine              | 0.12093  | -0.02106 | 0.15946  |
| C3 propionylcarnitine      | 0.11964  | -0.07648 | 0.11718  |
| tryptophan                 | 0.10825  | -0.28303 | -0.21583 |
| anserine                   | 0.1082   | -0.03092 | 0.27572  |
| creatinine                 | 0.10746  | -0.19772 | -0.08689 |
| proline                    | 0.10623  | 0.11574  | 0.12005  |
| cystamine                  | 0.10535  | -0.0035  | 0.11292  |
| C4 butyrylcarnitines       | 0.10476  | -0.09755 | 0.26559  |
| xanthurenate               | 0.09597  | -0.27498 | -0.18268 |
| glycine                    | 0.09124  | 0.05574  | -0.12788 |
| cystine                    | 0.09094  | 0.14916  | 0.32085  |
| taurine                    | 0.08703  | -0.20052 | 0.0143   |
| carnitine                  | 0.0852   | -0.06796 | 0.02252  |
| C3DC malonylcarnitine      | 0.083    | -0.03298 | 0.14064  |
| beta_alanine               | 0.08221  | 0.1121   | 0.20859  |
| alanine                    | 0.08182  | 0.15815  | 0.27021  |
| serine                     | 0.08126  | 0.21422  | 0.07706  |
| threonine                  | 0.0774   | 0.03731  | 0.01726  |
| cis/trans hydroxyproline   | 0.06775  | -0.072   | -0.01375 |
| creatine                   | 0.0659   | -0.07147 | 0.04665  |
| anthranilic acid           | 0.05712  | -0.23145 | -0.09777 |
| isoleucine                 | 0.05318  | -0.00067 | 0.02583  |
| anandamide                 | 0.05218  | -0.24474 | 0.10838  |
| C5 glutarylcarnitine       | 0.04598  | 0.06004  | 0.12652  |
| phosphocholine             | 0.03502  | -0.15232 | -0.14303 |
| ADMA/SDMA                  | 0.03319  | -0.26372 | -0.08421 |
| C4 methylmalonylcarnitine  | 0.03281  | -0.16034 | 0.0653   |
| thymidine                  | 0.03225  | 0.03154  | 0.05301  |
| arginosuccinate            | 0.02112  | 0.21244  | 0.06152  |
| adenosine                  | 0.01905  | -0.19492 | -0.08494 |
| arginine                   | 0.01802  | 0.14692  | 0.1465   |
| 5-hydroxyindoleacetic acid | 0.00433  | 0.02236  | 0.12677  |
| aspartate                  | -0.00504 | 0.0833   | 0.12437  |
| homocysteine               | -0.01473 | -0.00147 | 0.03308  |
| dimethyl-2-oxoglutarate    | -0.01517 | -0.11352 | -0.03436 |
| GABA                       | -0.02122 | -0.32218 | -0.37483 |
| NMMA                       | -0.0263  | 0.08696  | 0.06276  |
| xanthosine                 | -0.03206 | -0.20602 | -0.03361 |
| valine                     | -0.09073 | 0.11796  | 0.06162  |
| leucine                    | -0.09435 | 0.04258  | -0.07063 |
| methionine sulfoximine     | -0.14308 | -0.02359 | -0.17099 |
| glutamate                  | -0.18078 | 0.10582  | 0.10764  |

ADMA/SDMA, asymmetric and symmetric dimethylarginine; GABA, gamma-aminobutyric acid; LVEF, left ventricular ejection fraction; LVMI, left ventricular mass index; NMMA, N-methyl-L-arginine; RWT, relative wall thickness
